# Supplementary material for: Association of Liposome-Encapsulated Trivalent Antimonial with Ascorbic Acid: An Effective and Safe Strategy in the Treatment of Experimental Visceral Leishmaniasis
Source: PubMed Central journal article supplement (PMC4126701; doi:10.1371/journal.pone.0104055), 2014-08-08

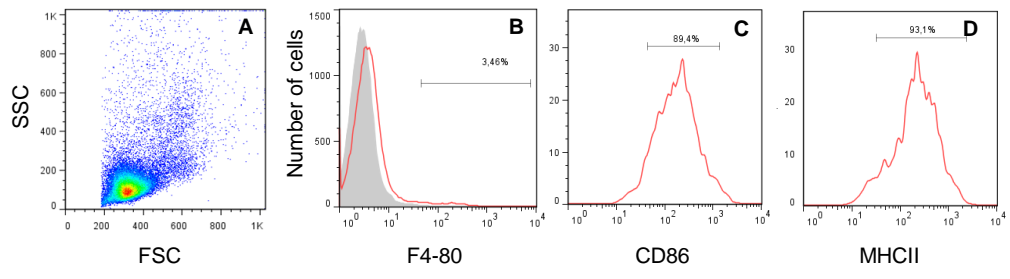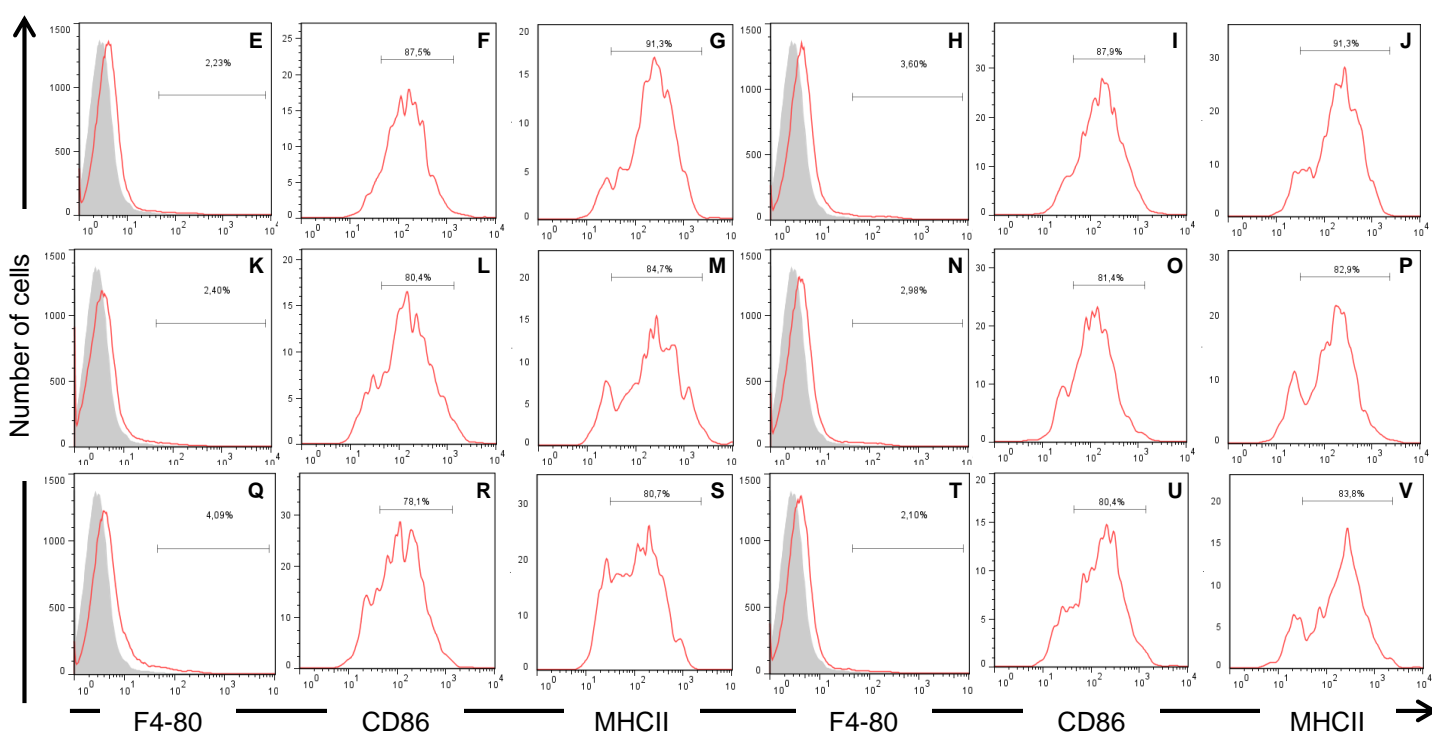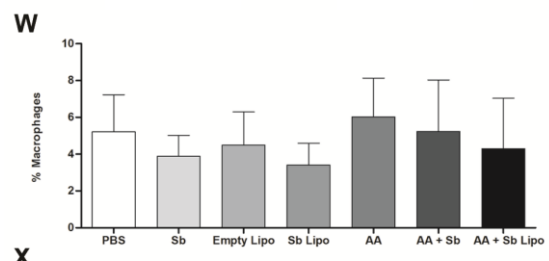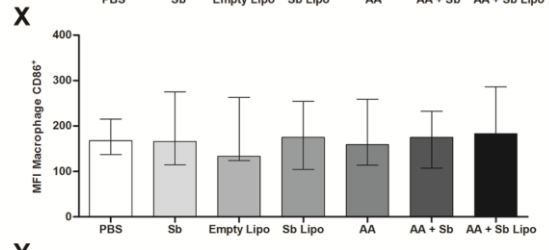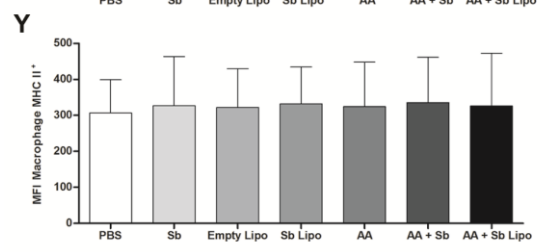

Supplement: pone.0104055.s004.pdf [file pone.0104055.s004.pdf]
